RESEARCH ARTICLE

# Impact and recovery process of mini flash crashes: An empirical study

Tobias Braun<sup>✉\*</sup>, Jonas A. Fiegen<sup>\*✉</sup>, Daniel C. Wagner, Sebastian M. Krause, Thomas Guhr

Faculty of Physics, University of Duisburg-Essen, Lotharstrasse 1, 47057 Duisburg, Germany

<sup>✉</sup> These authors contributed equally to this work.

\* [tobias.braun.13@stud.uni-due.de](mailto:tobias.braun.13@stud.uni-due.de) (TB); [jonas.fiegen@uni-due.de](mailto:jonas.fiegen@uni-due.de) (JF)

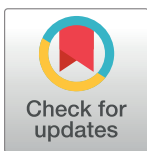

## Abstract

In an Ultrafast Extreme Event (or *Mini Flash Crash*), the price of a traded stock increases or decreases strongly within milliseconds. We present a detailed study of Ultrafast Extreme Events in stock market data. In contrast to popular belief, our analysis suggests that most of the Ultrafast Extreme Events are not necessarily due to feedbacks in High Frequency Trading: In at least 60 percent of the observed Ultrafast Extreme Events, the largest fraction of the price change is due to a single market order. In times of financial crisis, large market orders are more likely which leads to a significant increase of Ultrafast Extreme Events occurrences. Furthermore, we analyze the 100 trades following each Ultrafast Extreme Events. While we observe a tendency of the prices to partially recover, less than 40 percent recover completely. On the other hand we find 25 percent of the Ultrafast Extreme Events to be almost recovered after only one trade which differs from the usually found price impact of market orders.

## OPEN ACCESS

**Citation:** Braun T, Fiegen JA, Wagner DC, Krause SM, Guhr T (2018) Impact and recovery process of mini flash crashes: An empirical study. PLoS ONE 13(5): e0196920. <https://doi.org/10.1371/journal.pone.0196920>

**Editor:** Alejandro Raul Hernandez Montoya, Universidad Veracruzana, MEXICO

**Received:** May 30, 2017

**Accepted:** April 23, 2018

**Published:** May 21, 2018

**Copyright:** © 2018 Braun et al. This is an open access article distributed under the terms of the [Creative Commons Attribution License](https://creativecommons.org/licenses/by/4.0/), which permits unrestricted use, distribution, and reproduction in any medium, provided the original author and source are credited.

**Data Availability Statement:** Relevant data were obtained by the authors from the third party NYSE Group. All data sets from the historical Trades and Quotes database needed to replicate this study are available from the following URL: <http://www.nyxdata.com/data-products/daily-taq> As none of the authors had special access privileges to the data, it will be made available to all interested researchers in the same fashion.

**Funding:** The author(s) received no specific funding for this work.

## Introduction

Within the last two decades, algorithmic trading [1–3] gained in importance at global stock markets [4, 5]. In contrast to conventional traders, algorithmic traders automatically make trading decisions, place and observe orders [6]. This increasing influence of algorithmic trading within the past years prompted the installation of the ATP-flag (Automated Trader Program) as an indicator of algorithmic trading at the Xetra stock exchange [7]. Currently, an equivalent tool indicating algorithmic trading is not available at US markets. There are clear differences in human versus algorithmic trading behaviour. One obvious advantage of algorithmic traders over humans is the quicker reaction time, which for example can be exploited for high frequency arbitrage [8]. The drastically increasing performance of networks and computers during the past decades accelerates this progress [9–11]. Not surprisingly, High Frequency Trading (HFT) is often being criticized by market participants as well as by the media and in the political discussion [12, 13].

During the rise of algorithmic trading, a new challenge emerged in the form of so called flash crashes, with large price changes in very short times [14, 15]. The flash crash of May 6 in

**Competing interests:** The authors have declared that no competing interests exist.

2010 produced one of the largest ever intraday point decline of Dow Jones of almost 1000 points. This event affected many stocks, some of them losing almost their entire value, others rising by more than a factor of one thousand [14]. As the shock appeared too fast for human intervention, some market transactions have been rescinded later that day, and later market regulation established upper bounds for price movements in short periods [16].

There is also a large number of less drastic mini flash crashes, usually in only one stock at a time [17–19]. The reasons of flash crashes are discussed controversially. Explanations include imbalanced liquidity [20–22], market manipulation [23], and large orders are discussed as triggers, from mistyped fat finger trades to intermarket sweep orders [18]. A special focus is on HFT [15, 24–26], especially because on short time scales algorithmic feedbacks could be dominating, without possibility for human intervention. Johnson *et al.* [15] find 18520 Ultrafast Extreme Events (UEEs) using a criterion described below. They regard HFT as a potential cause for financial crises [27]. On the other hand, it has been pointed out that such price jumps without incoming new information are typical for price processes in general [28, 29], even including human participation.

Another open question is the impact of flash crashes. While the prices after the big flash crash of 2010 recovered rapidly [30], the crash still demonstrated extreme risks for investors which are hard to evaluate and to handle [14]. The fast price recovery of flash crashes implies that they can be considered as bursts of volatility rather than as price jumps [31]. Anyhow, the price recovery after mini flash crashes has so far not been systematically evaluated. A comparison of recovery times with the usual price impact of market orders [32–34] could be interesting.

In an attempt to contribute to a clarification of these issues, we have a closer look on the interplay between UEEs and HFT by using order flow data [35, 36]. We test how often single market orders dominate the flash crashes. If this happens frequently, most flash crashes do not necessarily occur with an algorithmic feedback as discussed in [15]. A precise understanding of this methodological point is very important, as it has strong implications for the discussion of HFT. Furthermore we analyze, how often the price is restored to levels close to the price before the flash crash, and compare our findings with the common price impact of market orders [32]. The paper is organized as follows. We present our statistical analysis in *Results*. We discuss which mechanisms trigger UEEs in *Mechanism for UEEs*. Finally, we analyze the impact of UEEs on the further development of traded prices in *Impact and recovery of UEEs*. We conclude our findings in *Discussion*.

## Data set

We consider a data set of trades and quotes for all stocks of the S&P 500 which were continuously traded during 2007 and 2008. During this time of financial crisis a high number of UEEs has been reported [18] therefore the according data are interesting for an analysis of these events. Further our data overlap with the data basis of [15] and [18] proposing opposite mechanisms of UEEs. While [18] points out that large orders are a typical reason of UEEs, [15] proposes a new *all-machine phase* with short time scales making human intervention impossible. The latter had a large impact on the public discussion of high frequency trading [12, 27]. With this paper we want to contribute to a more differentiated discussion of UEEs. We test whether the trades and quotes data itself holds evidence for large orders as a reason of flash crashes. This contributes to the methodological discussion how trades and quotes data are analyzed and which conclusions can be drawn. Analyzing more recent data is beyond the scope of this study, our point is a more refined data analysis in order to avoid mis-conclusions.

The data set was acquired from the NYSE Group (“TAQ Database Release 3.0”) and contains data with a timestamp precision of one second on the following stock exchanges: American Stock Exchange (today: NYSE MKT), Archipelago Exchange (today: NYSE Arca), BATS Global Markets, Boston Stock Exchange (today: NASDAQ OMX BX), Chicago Stock Exchange, International Securities Exchange, NASDAQ Stock Market, NASDAQ ADF (Alternative Display Facility), National Stock Exchange, New York Stock Exchange and Philadelphia Stock Exchange (today: NASDAQ OMX PHLX). To deal with the limited timestamp precision, we arranged trades with the same timestamp equidistantly within the second they occur.

The trades data offer sufficient information for detecting the occurrence of UEEs. Those that are detected on larger time scales such as so called *breakdowns* [37] are excluded in this analysis. Here we use the commonly employed criterion put forward by Nanex [17], where an UEE occurs whenever the traded price changes monotonously by at least 0.8 percent within 1.5 seconds and at least ten trades. We slightly increase the time span to two seconds because of the limited time resolution of our data set. The chronological order of trades within one second is known. This enables us to test whether the price moves monotonously. Thereby we refer to a flash crash (spike) when the price moves in negative (positive) direction.

## Results

In *General statistical properties* we focus on statistical aspects of UEEs. When did they occur predominantly? Which stocks and stock exchanges are most effected? Do these events occur simultaneously across different stocks and stock exchanges? What is the typical size of these events?

### General statistical properties

Following the above mentioned UEE criterion we find 5529 UEEs in our dataset. [Table 1](#) groups them according to the industrial sectors. It is remarkable that the financial sector clearly dominates with 33.35 events per company on average, followed by the energy sector with 14.36 and the telecommunication service sector with 12.14. In addition, the standard deviation is extremely high for firms in the financial sector: for instance, the stock of Morgan Stanley (MS) exhibits 717 such UEEs during 2007 and 2008. Furthermore [Table 2](#) shows that there are seconds in time in which more than one UEE occurs. In all of these cases the UEEs occur in different stocks within the same seconds. For example, the probability that more than

**Table 1. Occurrences of UEEs depending on their industrial sector (as per Global Industry Classification Standard).**

| industrial sector (GICS)    | number of companies | number of events |             |                    |
|-----------------------------|---------------------|------------------|-------------|--------------------|
|                             |                     | total            | per company | standard deviation |
| Consumer Discretionary      | 79                  | 508              | 6.43        | 5.76               |
| Consumer Staples            | 38                  | 122              | 3.21        | 2.69               |
| Energy                      | 39                  | 560              | 14.36       | 23.08              |
| Financials                  | 77                  | 2568             | 33.35       | 84.51              |
| Health Care                 | 48                  | 249              | 5.19        | 5.75               |
| Industrials                 | 61                  | 274              | 4.49        | 7.27               |
| Information Technology      | 65                  | 486              | 7.48        | 8.35               |
| Materials                   | 31                  | 362              | 11.68       | 19.49              |
| Telecommunications Services | 7                   | 85               | 12.14       | 12.51              |
| Utilities                   | 33                  | 315              | 9.55        | 42.14              |

For every sector we calculate the total and average number of occurrences as well as the corresponding standard deviation.

<https://doi.org/10.1371/journal.pone.0196920.t001>

**Table 2. Total amount of UEEs within one second in which at least one UEE occurs.**

| UEEs within one second | 1    | 2   | 3  | 4  | 5 | 6 | 7 | 8 |
|------------------------|------|-----|----|----|---|---|---|---|
| occurrences            | 4514 | 372 | 50 | 16 | 6 | 2 | 1 | 1 |

This listing is not accumulative.

<https://doi.org/10.1371/journal.pone.0196920.t002>

one UEE occurs within a second is about 9%. At 10:35:01 on the 10th of December 2008 eight UEEs occurred within one second on different stocks and stock exchanges which were APC (Anadarko Petroleum Corp.) on New York Stock Exchange, BHI (Baker Hughes Inc.) on BATS Global Markets, CAM (Cameron International Corp.) on BATS Global Markets, NE (Noble Corp.) on Archipelago Exchange, NOV (National Oilwell Varco Inc.) on Archipelago Exchange as well as VLO (Valero Energy) on New York Stock Exchange, Archipelago Exchange and NASDAQ Stock Market. All involved companies belong to the energy sector and all eight UEEs were flash crashes.

The absolute count of all UEE occurrences is shown in Fig 1. We see an enormous increase of UEEs at the beginning of the financial crisis in September and October 2008, 46.5% of the observed UEEs are flash crashes, hence 53.5% of them are flash spikes. These observations corroborate the results of Golub *et al.* [18, 38], who used a similar data set. To determine the UEE size, *i.e.* the price deviation between the beginning and the end of an UEE, we have to define what the end of an UEE is.

In our study the first trade after an UEE either reverses the price trend or occurs after an at least one second lasting trading pause, whichever happens earlier. The former trigger applies in 78.3% of all cases, whereas the latter ratio is 21.7%. The UEE size histogram in Fig 2 clearly reflects the 8‰ UEE criterion. As an average relative price jump we calculate  $-13.9\%$  and  $15.3\%$ , respectively, and the probability for a larger price jump than 5% is 1.1% for flash crashes and 1.68% for flash spikes.

### Mechanism for UEEs

We consider two opposing scenarios that generate UEEs. First, if—in case of a flash crash (spike)—the best bid (ask) during an UEE decreases (increases) abruptly from one time step to

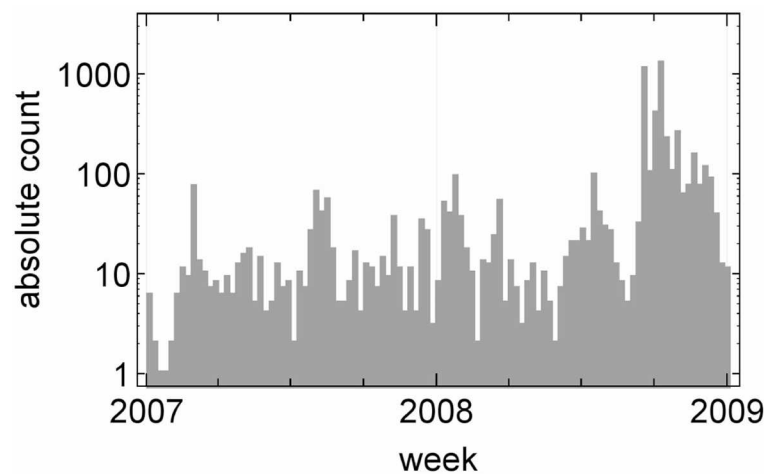

**Fig 1. Absolute count on a logarithmic scale of all UEE occurrences versus time with a bin size of one week.** At the end of the third and at the beginning of the last quarter in 2008, the number of UEEs virtually explodes due to the financial crisis.

<https://doi.org/10.1371/journal.pone.0196920.g001>

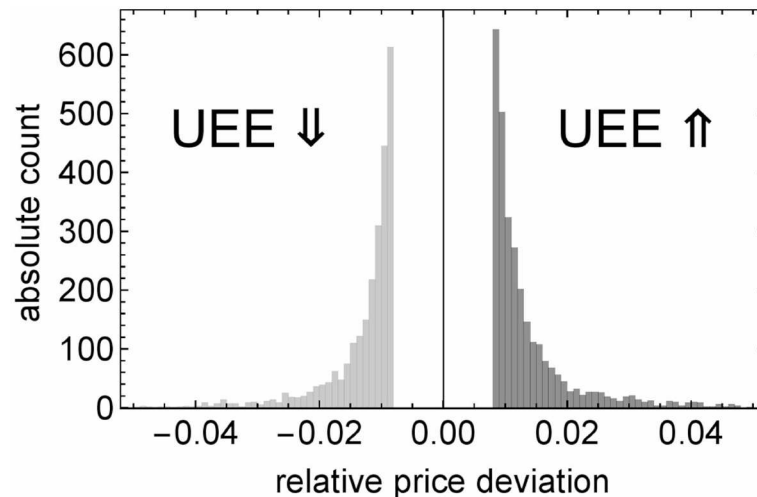

**Fig 2. Absolute count of all UEE occurrences versus the relative price deviations.** It is shown on a linear scale with a bin size of 0.001. The gap around zero is due to the UEE criterion. The double arrows indicate the direction of the price change.

<https://doi.org/10.1371/journal.pone.0196920.g002>

the next, a large sell (buy) market order has to be the reason for this extreme event. In this case, “large” corresponds to the relative quote price change. Second and in contrast, if the corresponding best value changes in minor price jumps, small market orders have created this UEE. Since these events occur within a few milliseconds, only the first scenario can be caused by a human trader, whereas many minor market orders within a very short time interval can only be placed by high frequent trading algorithms. In this context, we exclude a random “coherent” synchronization by human traders induced by an external information that could theoretically also lead to the same scenario.

To determine which effect dominates, we calculate for each UEE the largest price jump of the best bid or the best ask, respectively. The results are shown in Fig 3. In 57% (60%) of all flash crash (spike) events there is one market order that causes a return of at least 0.5%. Moreover, in 40% (45%) of the cases, a single market order leads to a price jump that is big enough to fulfill the 8‰ UEE criterion. This shows that huge market orders contribute to the observed quote price jump by a major fraction. Hence all traders, not only high frequent traders, are able to cause extreme price movements. Furthermore these findings can be interpreted in context of the results of Golub *et al.* [18]: with a similar dataset these authors find 67.85% of all UEEs to be initiated by so called Intermarket Sweep Orders (ISOs). Although we are not able

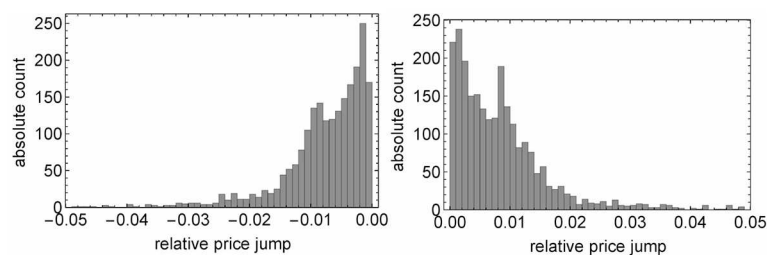

**Fig 3. Absolute count of all flash crash (spike) occurrences.** Each UEE is represented by its largest best bid (ask) price jump. The scale is linear.

<https://doi.org/10.1371/journal.pone.0196920.g003>

to identify ISOs this observation supports our conclusion that large market orders dominate the price movement in UEEs since ISOs typically result in one single huge trade event.

Which stocks are vulnerable to UEEs?—We compare (not shown) typical order book snapshots of GS (Goldman Sachs Group Inc.) and AAPL (Apple Inc.). GS has 124 UEEs in 2008 and AAPL only has nine. We see that the order book of GS has many empty price levels whereas the order book of AAPL is densely populated. A large market order would therefore lead to a larger price jump for GS than the same market order would do for AAPL. We conclude that UEEs are rare for AAPL because the stock is very liquid and market orders would have to be very big and costly to generate UEEs.

### Impact and recovery of UEEs

A further step to a better understanding of UEEs is the observation of the price behavior after the UEEs' have reached their extreme values. For every UEE we calculate the crash/spike recovery rate  $\eta_n$ . As illustrated in Fig 4, we denote by  $t_0^{(UEE)}$  the time at which the UEE sets in, by  $t_0^{(rec)}$  the time at which the recovery sets in and by  $t_n^{(rec)}$  the time at which the  $n$ -th trade after beginning of the recovery occurs. The corresponding stock prices are  $S(t_0^{(UEE)})$ ,  $S(t_0^{(rec)})$  and  $S(t_n^{(rec)})$ . We introduce the crash/spike recovery rate by the definition

$$\eta_n = \frac{S(t_0^{(rec)}) - S(t_n^{(rec)})}{S(t_0^{(rec)}) - S(t_0^{(UEE)})} \tag{1}$$

Thus,  $\eta_n$  describes how much the UEE has recovered up to trade  $n$ ,  $\eta_n = 0$  means the stock price has not recovered and is the same as  $S(t_0^{(UEE)})$  whereas  $\eta_n = 1$  indicates that there was a full

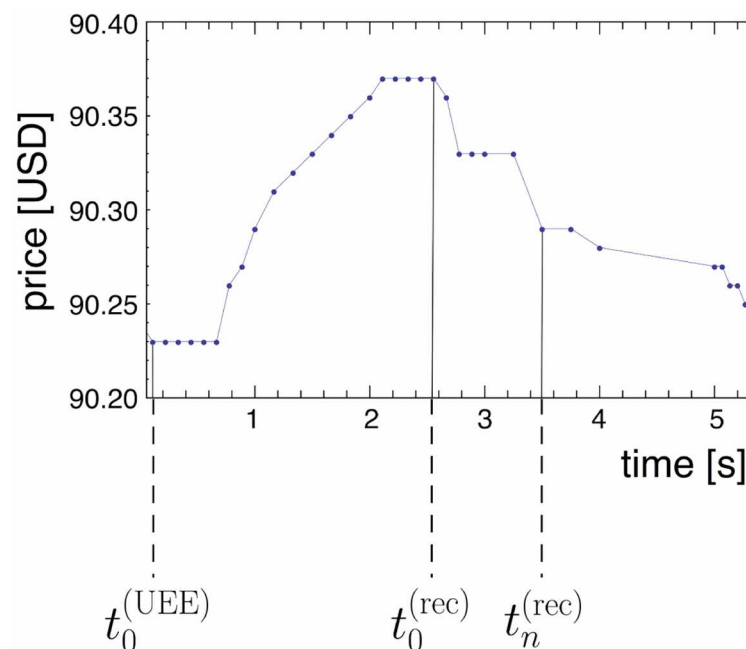

**Fig 4. Price time series of a typical UEE to illustrate the definition of the recovery rate  $\eta_n$ .** The shown excerpt is the price time series of AAPL on NASDAQ, 12/01/2008. The vertical lines mark the specific instances  $t_0^{(UEE)}$ ,  $t_0^{(rec)}$  and  $t_n^{(rec)}$  in time.

<https://doi.org/10.1371/journal.pone.0196920.g004>

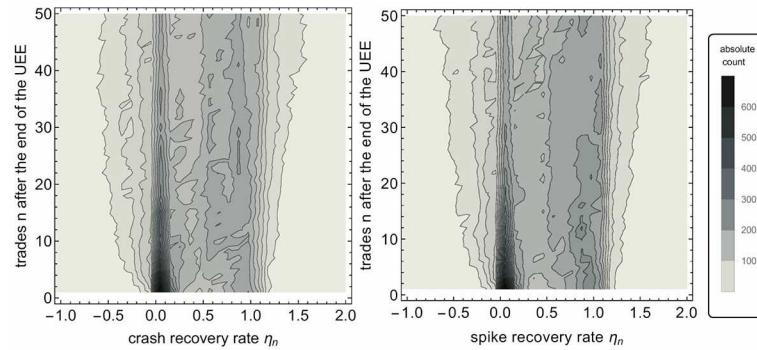

**Fig 5. Histogram of all flash crashes (spikes) depending on their recovery rate  $\eta_n$ .** It shows the absolute count of all flash crashes (spikes) as level curves over the plane of recovery rate  $\eta_n$  and number of trades  $n$  (with  $1 \leq n \leq 50$ ) after the end of the UEE. Due to better visualization an empty line is added for  $n = 0$ .

<https://doi.org/10.1371/journal.pone.0196920.g005>

recovery and the stock price is equal to  $S(t_0^{(UEE)})$ . Of course,  $\eta_n$  can be greater than one or less than zero as well, because  $S(t_0^{(rec)})$  and  $S(t_0^{(UEE)})$  are not subject to boundaries.

Fig 5 shows the histograms for all crashes or spikes, respectively, and  $1 \leq n \leq 50$ . While in both cases it is most likely that the stock price stays at the UEE extremum directly after the event, there are also cases in which it recovers immediately. Over the next trades, the histogram blurs considerably which is plausible as trading continues. Large price recovery even after a few trades is in sharp contrast with long lasting price impacts of market orders, see Bouchaud *et al.* [32]. Even the impact of more complex market influences, as for example effective market orders consisting of many smaller market orders, are known to have long lasting market impacts [34].

Furthermore we also calculate the probability for  $\eta_n \geq 0.8$  and  $\eta_n \leq 0.2$  crash/spike recovery rates as function of  $n$  to answer the question: How likely is an UEE to almost recover or tentatively remain at their extremum? The results are shown in Fig 6. We see that as more trades go by, it becomes more likely that an UEE recovers by at least 80%. In contrast the probability of not recovering decreases until  $n = 30$ , but then constantly about 30% of these UEEs recover by less than 20%. Unexpectedly, the amount of recovered flash crashes decreases for about five trades before it starts to increase monotonously. This indicates that in about 2% of the UEEs a flash crash is immediately followed by downward price trends which might be considered as “aftershocks” of the respective extreme event. This does not seem to be the case for the flash spikes.

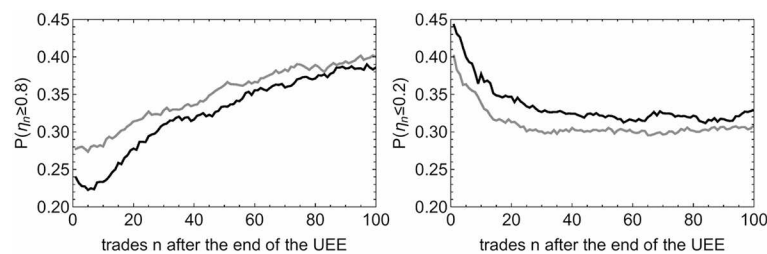

**Fig 6. Probabilities of recovery.** Probabilities  $P(\eta_n \geq 0.8)$  and  $P(\eta_n \leq 0.2)$  for the event “UEE is recovered by at least 80% or 20%, respectively” versus the number  $n$  of trades after the end of the UEE for flash crashes (black) and flash spikes (gray).

<https://doi.org/10.1371/journal.pone.0196920.g006>

## Conclusion

We found a total number of 5529 UEEs in 2007 and 2008. The financial sector clearly dominated with an average of 33.35 UEEs per company. Our analysis supports the observation that stocks with lower liquidity are more likely to generate large price changes which can lead to UEEs. Differentiating between flash crashes and flash spikes, the probability to observe the latter is higher by 7%. Concerning the frequency of UEEs it is not uncommon to find more than one UEE per second. In fact the probability for this to occur is approximately 9%. Especially in times of financial crisis the total frequency of UEEs surges as also found by Johnson *et al.* [15].

To analyze the mechanism that leads to the occurrence of UEEs we distinguished between two microscopic interpretations. On the one hand the scenario put forward by Johnson *et al.* [15] includes a new *all-machine phase* in which many small market orders occur that—considering the time scale—can only be linked to HFT. On the other hand we assumed that already large market orders would be able to dominate the observed price changes within a typical UEE, in agreement with Golub *et al.* [18]. This would conversely indicate that not only algorithmic but also human traders could cause UEEs. In our analysis this interpretation is substantiated by the fact that about 60% of the UEEs contain one market order that already generates a return of 0.5%. In contrast to the first scenario that considers UEEs as completely driven by HFT, the observation that large market orders play a major role shows that this has not necessarily to be the case. Thus, our analysis does not corroborate the conclusions of Johnson *et al.* [15]. Nevertheless, it is worthwhile mentioning that the time resolution in our analysis was limited to one second. It is thus desirable to carry out such an analysis with millisecond accuracy.

Furthermore, it would be desirable to repeat the study with contemporary data to learn more about today's trading behaviour. The share of HFT in U.S. has stagnated after the financial crisis [39]. One possible reason of this development is an increased competition of high frequency traders among each other, with the consequence of reduced earning opportunities [40, 41]. The market situation after the financial crisis as compared to 2007/2008 is also altered due to changed market regulation rules [42], some of them were introduced to reduce market risks, especially during flash crashes [16]. However, the success of regulatory interventions in reducing such risks has been found to be limited [42]. There was another large flash crash of U.S. stocks on February 5 in 2018, and further large flash crashes occurred around the world. For example, on October 7 in 2016 there was a flash crash of the British Pound course, the price in U.S. Dollars reduced almost ten percent. For the U.S. stock exchanges, large price movements during one minute intervals (with returns more than four times larger than the current volatility) are reported in the whole period from 2001 to 2013 [43]. The monthly number of large price movements has only slightly diminished in this time period. This indicates that mini flash crashes still occur frequently in the time after the financial crisis. One phenomenon which is increasingly important for later times are clustered large price movements of many stocks at the same time [43]. In our dataset from 2007/2008, clustered mini flash crashes of many stocks at the same time play only a minor role. The observation reported here that a large part of all mini flash crashes is triggered simply by large orders emphasizes that HFT is not necessarily harmful. It is reasonable to assume that large orders still play a significant role in contemporary data, therefore a study of more recent data could help to compare the risks and benefits of HFT. The recent literature emphasizes that HFT can improve market quality by means of lower spreads, faster execution speed and higher informational efficiency of prices [42]. Concerning information acquisition, the short reaction times of algorithmic traders lead to a higher activity shortly after macroscopic news arrival, accompanied by an order imbalance. This results in modest



economical benefits [44]. On the other hand, HFT is discussed as a source of risk, especially with evaporating liquidity in volatile times [45, 46].

Having investigated possible causes of UEEs we studied their impact on the subsequent trading. As one would anticipate the amount of recovering UEEs rises with the total number of trades ahead. Nevertheless a fraction of 30% of all UEEs recover less than 20% with respect to the price level before the UEE occurs.

Regarding the fact that about 25% of the UEEs are almost recovered after one trade, there must be processes in the order book dynamics that lead to this observation. At this point one could argue that this should be linked to different types of UEEs with respect to their impact on the following trades which one could try to classify, as an extension to already existing allocations as suggested by Nokerman [19]. The fast price recovery indicates that flash crashes do not reflect the perceptions of investors, but are rather short lasting accidents which are rapidly repaired, see also Christensen *et al.* [31]. Interesting further questions in this direction are the long term price impact, the impact of a flash crash in one stock on the price of other stocks [47], and aftershocks [48].

## Acknowledgments

We thank Rudi Schäfer and Thilo Schmitt for fruitful discussions and helpful advice at the initial stages of the project.

## Author Contributions

**Conceptualization:** Thomas Guhr.

**Data curation:** Daniel C. Wagner.

**Formal analysis:** Daniel C. Wagner.

**Investigation:** Tobias Braun, Jonas A. Fiegen, Daniel C. Wagner, Sebastian M. Krause.

**Project administration:** Thomas Guhr.

**Supervision:** Sebastian M. Krause, Thomas Guhr.

**Validation:** Tobias Braun, Jonas A. Fiegen, Sebastian M. Krause, Thomas Guhr.

**Visualization:** Tobias Braun, Jonas A. Fiegen, Daniel C. Wagner.

**Writing – original draft:** Tobias Braun, Jonas A. Fiegen, Daniel C. Wagner, Sebastian M. Krause.

**Writing – review & editing:** Thomas Guhr.

## References

1. Hu Y, Liu K, Zhang X, Su L, Ngai E, Liu M. Application of evolutionary computation for rule discovery in stock algorithmic trading: A literature review. *Applied Soft Computing*. 2015; 36:534–551. <https://doi.org/10.1016/j.asoc.2015.07.008>
2. Aldridge I. High-frequency trading: a practical guide to algorithmic strategies and trading systems. vol. 459. Hoboken, New Jersey: John Wiley and Sons; 2009.
3. Harris L. Order exposure and parasitic traders. University of Southern California. 1997;.
4. Breuer A. An Empirical Analysis of Order Dynamics in a High-Frequency Trading Environment. Studienreihe der Stiftung Kreditwirtschaft an der Universität Hohenheim; 2012.
5. Hendershott T, Riordan R. Algorithmic Trading and the Market for Liquidity. *Journal of Financial and Quantitative Analysis*. 2013; 48(4):1001–1024. <https://doi.org/10.1017/S0022109013000471>
6. Hendershott T, Riordan R. Algorithmic Trading and Information. Working Paper. 2009;.

7. Boerse D. XETRA Rundschreiben 171; 2004. [http://www.xetra.com/blob/1198844/2ef8784bfac089e2117c97f90ba63efc/data/171\\_04d.pdf](http://www.xetra.com/blob/1198844/2ef8784bfac089e2117c97f90ba63efc/data/171_04d.pdf).
8. Foucault T. Where are the risks in high frequency trading? *Financial Stability Review*. 2016;( 20):53–67.
9. Moore GE. Cramming more components onto integrated circuits. *Electronics*. 1965; 38(8).
10. Supercomputer Performance Development; 2016. <http://top500.org/statistics/perfdevel/>.
11. Young M, Fleck B, Kießling A, Kowarschik R, Rehn H, Wenke L. *Optik, Laser, Wellenleiter*. Springer Berlin Heidelberg; 1997.
12. Zydra M. Hochfrequenzhandel—Schneller als Menschen; 2015. Available from: <http://www.sueddeutsche.de/wirtschaft/hochfrequenzhaendler\protect\discretionary{\char\hyphenchar\font}\{\}\der-blitzangriff-1.2623740>.
13. Johnson N. The high-tech arms race that's causing stock markets 'tsunamis'; 2014. Available from: <http://edition.cnn.com/2014/08/13/opinion/stock-market-tsunamis/>.
14. Haldane AG. The race to zero. In: *The Global Macro Economy and Finance*. Springer; 2012. p. 245–270.
15. Johnson N, Zhao G, Hunsader E, Qi H, Johnson N, Meng J, et al. Abrupt rise of new machine ecology beyond human response time. *Scientific reports*. 2013; 3:2627. <https://doi.org/10.1038/srep02627> PMID: 24022120
16. Serritella DM. High speed trading begets high speed regulation: SEC response to flash crash, rash. *U Ill JL Tech & Pol'y*. 2010; p. 433.
17. Nanex UEE data; 2017. Available from: [http://www.nanex.net/FlashCrashEquities/FlashCrashAnalysis\\_Equities.html](http://www.nanex.net/FlashCrashEquities/FlashCrashAnalysis_Equities.html).
18. Golub A, Keane J, Poon SH. High frequency trading and mini flash crashes. arXiv preprint arXiv:12116667. 2012;.
19. Nokerman C. "A taxonomy of mini flash crashes". LOUVAIN SCHOOL OF MANAGEMENT; 2015.
20. Easley D, De Prado MML, O'Hara M. The microstructure of the "flash crash": Flow toxicity, liquidity crashes, and the probability of informed trading. *Journal of Portfolio Management*. 2011; 37(2):118–128. <https://doi.org/10.3905/jpm.2011.37.2.118>
21. Andersen TG, Bondarenko O. VPIN and the flash crash. *Journal of Financial Markets*. 2014; 17:1–46. <https://doi.org/10.1016/j.finmar.2013.05.005>
22. Cespa G, Foucault T. Illiquidity contagion and liquidity crashes. *Review of Financial Studies*. 2014; 27(6):1615–1660. <https://doi.org/10.1093/rfs/hhu016>
23. Brush S, Schoenberg T, Ring S. How a Mystery Trader With an Algorithm May Have Caused the Flash Crash; 2015.
24. Kirilenko A, Samadi M, Kyle AS, Tuzun T. The Flash Crash: The Impact of High Frequency Trading on an Electronic Market. SSRN preprint. 2011;.
25. Johnson N, Zhao G, Hunsader E, Meng J, Ravindar A, Carran S, et al. Financial black swans driven by ultrafast machine ecology. Working Paper. 2012;.
26. Pan W, Pentland AS, Cheng R, Emsbo-Mattingly L. Can High-Frequency Trading Drive the Stock Market Off a Cliff? *MIT Sloan Management Review*. 2013; 54(4):16.
27. Hofstetter Y. Das systemische Risiko der Dummheit. *Frankfurter Allgemeine Zeitung*. 2013; 240:25.
28. Filimonov V, Sornette D. Quantifying reflexivity in financial markets: Toward a prediction of flash crashes. *Physical Review E*. 2012; 85(5):056108. <https://doi.org/10.1103/PhysRevE.85.056108>
29. Hardiman S, Bercot N, Bouchaud JP. Critical reflexivity in financial markets: a Hawkes process analysis. *The European Physical Journal B: Condensed Matter and Complex Systems*. 2013; 86(10):1–9. <https://doi.org/10.1140/epjb/e2013-40107-3>
30. Madhavan A. Exchange-traded funds, market structure, and the flash crash. *Financial Analysts Journal*. 2012; 68(4):20–35. <https://doi.org/10.2469/faj.v68.n4.6>
31. Christensen K, Oomen RC, Podolskij M. Fact or friction: Jumps at ultra high frequency. *Journal of Financial Economics*. 2014; 114(3):576–599. <https://doi.org/10.1016/j.jfineco.2014.07.007>
32. Bouchaud JP, Gefen Y, Potters M, Wyart M. Fluctuations and response in financial markets: the subtle nature of 'random' price changes. *Quantitative finance*. 2004; 4(2):176–190. <https://doi.org/10.1080/14697680400000022>
33. Bouchaud JP, Farmer JD, Lillo F. How Markets Slowly Digest Changes in Supply and Demand. In: Hens T, Schenk-Hoppé KR, editors. *Handbook of Financial Markets: Dynamics and Evolution*. Handbooks in Finance. San Diego: North-Holland; 2009. p. 57–160. Available from: <http://www.sciencedirect.com/science/article/pii/B9780123742582500063>.

34. Tóth B, Lemperiere Y, Deremble C, De Lataillade J, Kockelkoren J, Bouchaud JP. Anomalous price impact and the critical nature of liquidity in financial markets. *Physical Review X*. 2011; 1(2):021006.
35. Friedman D, Rust J. *The Double Auction Market*. The Advanced Book Program; 1993.
36. Johnson B. *Algorithmic Trading & DMA*. 4Myeloma Press; 2010.
37. Gao C. *High frequency trading, hidden orders and market quality in equities*. Rutgers, The State University of New Jersey; 2015.
38. Golub A, Keane J. *Mini Flash Crashes*; 2011.
39. Goldstein M A, Kumar P, Graves F C. Computerized and High-Frequency Trading. *The Financial Review* 2016; 49:177–202. <https://doi.org/10.1111/fire.12031>
40. Serbera J-P, Paumard P. The fall of high-frequency trading: A survey of competition and profits. *Research in International Business and Finance* 2016; 36:271–287 <https://doi.org/10.1016/j.ribaf.2015.09.021>
41. Adrian T, Fleming M, Shachar O, Vogt E. Market liquidity after the financial crisis. *Annual Review of Financial Economics* 2017; 9:43–83. <https://doi.org/10.1146/annurev-financial-110716-032325>
42. Chung K H, Lee J. High-frequency Trading: Review of the Literature and Regulatory Initiatives around the World. *Asia-Pacific Journal of Financial Studies* 2016; 45(1):7–33. <https://doi.org/10.1111/ajfs.12120>
43. Calcagnile L M, Bormetti G, Treccani M, Marmi S, Lillo F. Collective synchronization and high frequency systemic instabilities in financial markets. *Quantitative Finance* 2017; 18(2):237–247. <https://doi.org/10.1080/14697688.2017.1403141>
44. Chordia T, Green C, Kottimukkalur B. Do high frequency traders need to be regulated? Evidence from trading on macroeconomic announcements. Working paper, 2016.
45. Conrad J, Wahal S, Xiang J. High-frequency quoting, trading, and the efficiency of prices. *Journal of Financial Economics* 2015; 116(2):271–291. <https://doi.org/10.1016/j.jfineco.2015.02.008>
46. Jain P K, Jain P, McInish T H. Does high-frequency trading increase systemic risk?. *Journal of Financial Markets* 2016; 31:1–24 <https://doi.org/10.1016/j.finmar.2016.09.004>
47. Wang S, Schäfer R, Guhr T. Cross-response in correlated financial markets: individual stocks. *The European Physical Journal B*. 2016; 89(4):1–16. <https://doi.org/10.1140/epjb/e2016-60818-y>
48. Petersen AM, Wang F, Havlin S, Stanley HE. Market dynamics immediately before and after financial shocks: Quantifying the Omori, productivity, and Bath laws. *Physical Review E*. 2010; 82(3):036114.
